# Supplementary material for: Hypoglycemia at Admission in Patients With Acute Myocardial Infarction Predicts a Higher 30-Day Mortality in Patients With Poorly Controlled Type 2 Diabetes Than in Well-Controlled Patients
Source: Oxford University Press journal article supplement (doi:10.2337/dc13-2856), 2014-06-10
Supplement: dc132856supplementarydata.pdf [file dc132856supplementarydata.pdf]

SUPPLEMENTARY DATA

**Supplementary Table 1.** The clinical characteristics of the 5 glucose groups based on admission serum glucose levels in AMI patients with type 2 diabetes.

| Groups                   | Group 1<br>(n= 255) | Group 2<br>(n= 7432) | Group 3<br>(n= 6276) | Group 4<br>(n= 3396) | Group 5<br>(n= 3737) | P value |
|--------------------------|---------------------|----------------------|----------------------|----------------------|----------------------|---------|
| Age (years)              | 67.6±0.7            | 63.1±0.2             | 64.4±0.2             | 64.4±0.2             | 65.2±0.2             | <0.001  |
| Female (%)               | 37.25%              | 27.20%               | 30.87%               | 32.69%               | 38.15%               | <0.001  |
| BMI (Kg/m <sup>2</sup> ) | 23.6±0.21           | 23.8±0.04            | 24.0±0.04            | 24.0±0.05            | 23.7±0.05            | <0.001  |
| sBP (mmHg)               | 128.5±1.88          | 129.2±0.2<br>9       | 128.4±0.3<br>4       | 128.7±0.4<br>9       | 126.4±0.50           | <0.001  |
| dBP (mmHg)               | 77.0±1.04           | 78.7±0.18            | 78.2±0.19            | 77.8±0.28            | 77.1±0.28            | <0.001  |
| Killip class I           | 59.91%              | 78.50%               | 72.13%               | 67.89%               | 55.45%               | <0.001  |
| II                       | 16.59%              | 11.91%               | 14.95%               | 14.88%               | 15.97%               |         |
| III                      | 14.28%              | 6.96%                | 8.27%                | 10.83%               | 16.54%               |         |
| IV                       | 9.22%               | 2.63%                | 4.65%                | 6.40%                | 12.06%               |         |
| Glucose (mmol/l)         | 2.97±0.05           | 6.36±0.01            | 9.19±0.01            | 12.58±0.0<br>2       | 19.39±0.08           | <0.001  |
| HbA1c (%)                | 8.08±0.13           | 6.74±0.04            | 7.10±0.03            | 7.64±0.03            | 8.76±0.05            | <0.001  |
| HbA1c (mmol/mol)         | 64.9±1.4            | 50.2±0.4             | 54.1±0.3             | 60.0±0.4             | 72.2±0.5             | <0.001  |
| TG (mmol/l)              | 1.27±0.05           | 1.35±0.01            | 1.40±0.01            | 1.48±0.02            | 1.51±0.02            | <0.001  |
| Creatinine (µmol/L)      | 136.7±8.9           | 104.9±1.9            | 109.3±1.9            | 120.8±2.9            | 133.7±3.0            | <0.001  |
| HDL cholesterol (mmol/l) | 1.06±0.02           | 1.12±0.01            | 1.11±0.01            | 1.10±0.01            | 1.08±0.01            | <0.001  |
| LDL cholesterol (mmol/l) | 2.82±0.07           | 2.98±0.01            | 2.95±0.01            | 2.91±0.02            | 2.92±0.03            | 0.001   |
| hsCRP (mg/L)             | 14.1±2.40           | 8.2±0.37             | 8.7±0.44             | 10.3±0.67            | 11.3±0.67            | <0.001  |
| Hypertension             | 60.94%              | 48.09%               | 54.42%               | 59.40%               | 58.49%               | <0.001  |
| Diabetes treatment       | 71.24%              | 58.95%               | 67.31                | 62.68                | 74.15                | <0.001  |
| Previous MI              | 7.06%               | 7.12%                | 7.68%                | 7.09%                | 8.53%                | 0.077   |
| Heart failure            | 3.92%               | 1.92%                | 2.19%                | 2.74%                | 3.73%                | <0.001  |
| PAD                      | 0.00%               | 1.04%                | 0.91%                | 0.88%                | 1.20%                | 0.260   |
| CVA                      | 9.41%               | 6.67%                | 7.60%                | 7.86%                | 7.92%                | 0.038   |
| Smoking                  | 30.70%              | 43.98%               | 40.00%               | 38.10%               | 35.90%               | <0.001  |
| Statin use               | 14.11%              | 7.24%                | 8.46%                | 8.75%                | 9.15%                | <0.001  |
| Aspirin use              | 18.82%              | 13.49%               | 15.69%               | 15.99%               | 16.40%               | <0.001  |
| Hypertension treatment   | 95.00%              | 87.52%               | 88.76%               | 91.76%               | 90.61%               | <0.001  |
| ACE inhibitor            | 4.31%               | 4.71%                | 4.54%                | 4.86%                | 4.65%                | 0.962   |
| ARB                      | 13.73%              | 6.16%                | 7.66%                | 7.77%                | 8.75%                | <0.001  |
| CCB                      | 12.16%              | 9.73%                | 10.45%               | 12.01%               | 10.70%               | 0.008   |
| Beta blocker             | 10.19%              | 8.54%                | 9.05%                | 8.86%                | 8.85%                | 0.785   |
| Diuretics                | 7.45%               | 4.96%                | 5.49%                | 5.68%                | 6.90%                | 0.001   |

\* The patients were divided into 5 groups according to the serum glucose levels at admission: Group 1, <3.9 mmol/L (<70 mg/dL); Group 2, 3.9-7.72 mmol/L (70-139 mg/dL); Group 3, 7.78-11.06 mmol/L (140-199 mg/dL); Group 4, 11.11-14.39 mmol/L (200-259 mg/dL); and Group 5, ≥14.44 mmol/L (≥260 mg/dL).

SUPPLEMENTARY DATA

Abbreviations: sBP, systolic blood pressure; dBP, diastolic blood pressure; HbA1c, hemoglobin A1c; hsCRP, high-sensitivity C-reactive protein; TG, triglycerides; MI; myocardial infarction; PAD, peripheral artery disease; CVA, cerebrovascular accident; ACE; angiotensin-converting enzyme, ARB, angiotensin receptor blocker; CCB; calcium channel blocker, PCI; percutaneous coronary intervention.

**Supplementary Table 2.** The clinical characteristics of the 5 glucose groups based on admission serum glucose levels in AMI patients without diabetes.

| Groups                   | Group 1<br>(n = 154) | Group 2<br>(n = 7,783) | Group 3<br>(n = 4,040) | Group 4<br>(n = 777) | Group 5<br>(n = 402) | P<br>value |
|--------------------------|----------------------|------------------------|------------------------|----------------------|----------------------|------------|
| Age (years)              | 63.8±1.1             | 62.4±0.2               | 63.9±0.2               | 66.7±0.5             | 67.6±0.6             | <0.001     |
| Female (%)               | 26.45%               | 24.46%                 | 27.25%                 | 35.31%               | 40.04%               | <0.001     |
| BMI (Kg/m <sup>2</sup> ) | 23.99±0.25           | 23.79±0.03             | 23.71±0.05             | 23.51±0.12           | 22.85±0.16           | <0.001     |
| sBP (mmHg)               | 123.2±2.26           | 130.2±0.29             | 127.5±0.42             | 123.8±1.07           | 114.6±1.65           | <0.001     |
| dBP (mmHg)               | 76.6±1.30            | 79.5±0.17              | 78.4±0.25              | 76.8±0.61            | 71.9±0.98            | <0.001     |
| Killip class I           | 70.68%               | 78.99%                 | 71.63%                 | 55.79%               | 33.70%               | <0.001     |
| II                       | 11.28%               | 13.17%                 | 15.50%                 | 17.81%               | 13.66%               |            |
| III                      | 9.02%                | 4.99%                  | 7.05%                  | 10.59%               | 17.62%               |            |
| IV                       | 9.02%                | 2.84%                  | 5.81%                  | 15.82%               | 35.02%               |            |
| Glucose (mmol/l)         | 3.33±0.06            | 6.39±0.01              | 8.96±0.01              | 12.37±0.03           | 18.84±0.22           | <0.001     |
| HbA1c (%)                | 6.19±0.15            | 5.69±0.01              | 5.78±0.01              | 5.88±0.02            | 5.77±0.03            | <0.001     |
| HbA1c (mmol/mol)         | 64.9±1.4             | 50.2±0.4               | 54.1±0.3               | 60.0±0.4             | 72.2±0.5             | <0.001     |
| TG (mmo/l)               | 1.39±0.07            | 1.38±0.01              | 1.37±0.01              | 1.35±0.03            | 1.03±0.04            | 0.461      |
| HDL cholesterol (mmol/l) | 1.07±0.02            | 1.11±0.01              | 1.13±0.01              | 1.12±0.01            | 1.08±0.01            | <0.001     |
| Creatinine (µmol/L)      | 142.7±31.9           | 95.6±1.5               | 99.8±2.3               | 118.2±7.9            | 121.9±4.7            | <0.001     |
| LDL cholesterol (mmol/l) | 2.92±0.08            | 3.00±0.01              | 3.04±0.01              | 2.93±0.03            | 2.81±0.05            | <0.001     |
| hsCRP (mg/L)             | 7.52±1.43            | 5.85±0.29              | 5.64±0.36              | 7.08±0.93            | 8.36±1.47            | 0.120      |
| Hypertension             | 40.9%                | 43.96%                 | 45.96%                 | 49.36%               | 46.82%               | <0.001     |
| Previous MI              | 9.68%                | 6.15%                  | 5.35%                  | 5.11%                | 5.53%                | 0.105      |
| Heart failure            | 2.58%                | 1.19%                  | 1.28%                  | 2.89%                | 2.10%                | <0.001     |
| PAD                      | 1.29%                | 0.45%                  | 0.63                   | 0.56%                | 0.38%                | 0.419      |
| CVA                      | 2.58%                | 5.96%                  | 5.90%                  | 5.67%                | 5.92%                | 0.521      |
| Smoking                  | 46.10%               | 46.24%                 | 43.60%                 | 36.94%               | 36.15%               | <0.001     |
| Statin use               | 6.45%                | 6.72%                  | 5.65%                  | 5.67%                | 5.34%                | 0.135      |
| Aspirin use              | 13.32%               | 11.99%                 | 10.91%                 | 12.45%               | 9.35%                | 0.152      |
| Hypertension treatment   | 90.16%               | 88.90%                 | 88.67%                 | 91.93%               | 92.86%               | 0.125      |
| ACE inhibitor            | 3.22%                | 2.83%                  | 2.83%                  | 3.21%                | 3.24%                | 0.962      |
| ARB                      | 7.10%                | 5.87%                  | 5.67%                  | 5.23%                | 3.82%                | 0.306      |
| CCB                      | 10.97%               | 7.95%                  | 7.75%                  | 6.34%                | 6.30%                | 0.149      |
| Beta blocker             | 3.87%                | 7.00%                  | 5.86%                  | 6.56%                | 6.69%                | 0.092      |
| Diuretics                | 3.87%                | 3.51%                  | 2.92%                  | 4.53%                | 3.63%                | 0.195      |

## SUPPLEMENTARY DATA

\* The patients were divided into 5 groups according to the serum glucose levels at admission: Group 1, <3.9 mmol/L (<70 mg/dL); Group 2, 3.9-7.72 mmol/L (70-139 mg/dL); Group 3, 7.78-11.06 mmol/L (140-199 mg/dL); Group 4, 11.11-14.39 mmol/L (200-259 mg/dL); and Group 5, ≥14.44 mmol/L (≥260 mg/dL). The abbreviations are the same as those used in Supplementary Table 1.

**Supplementary Table 3.** The factors associated with 30-day mortality by according to Cox proportional hazard regression analysis.

| Factors                        | HR (95% confidence intervals) | P value |
|--------------------------------|-------------------------------|---------|
| Patients without diabetes      |                               |         |
| Age (yrs)                      | 1.046 (1.030 - 1.062)         | <0.001  |
| sBP (mmHg)                     | 0.986 (0.979 - 0.993)         | <0.001  |
| Killip class (≥ 3)             | 3.237 (2.198 - 4.768)         | <0.001  |
| Heart failure                  | 2.683 (1.339 - 5.374)         | 0.005   |
| PAD                            | 7.918 (2.477 - 25.315)        | <0.001  |
| CVA                            | 1.818 (1.133 - 2.917)         | 0.013   |
| hsCRP (mg/L)                   | 1.007 (1.003 - 1.011)         | <0.001  |
| Hypoglycemia (< 3.9 mmol/l)    | 4.777 (2.090 -10.918)         | <0.001  |
| Hyperglycemia (≥ 14.44 mmol/l) | 2.548 (1.624 - 4.000)         | <0.001  |
| Patients with type 2 diabetes  |                               |         |
| Age (yrs)                      | 1.052 (1.040 - 1.067)         | <0.001  |
| Sex (M)                        | 1.050 (1.036 - 1.064)         | 0.024   |
| sBP (mmHg)                     | 0.737 (0.565 - 0.960)         | <0.001  |
| Killip classification (≥ 3)    | 3.255 (2.487 - 4.260)         | <0.001  |
| CVA                            | 1.791 (1.273 - 2.520)         | <0.001  |
| Creatinine (μmol/L)            | 1.011 (1.010 - 1.012)         | <0.001  |
| Previous MI                    | 2.139 (1.336 - 3.426)         | 0.002   |
| Aspirin use                    | 0.754 (0.575 - 0.989)         | 0.041   |
| hsCRP (mg/L)                   | 1.034 (1.023 - 1.046)         | <0.001  |
| Hypoglycemia (< 3.9 mmol/l)    | 2.866 (1.564 - 5.250)         | <0.001  |
| Hyperglycemia (≥ 14.44 mmol/l) | 1.617 (1.222 - 2.141)         | <0.001  |

\*Adjusted for age, sex, BMI, hypertension, hypertensive medication, dyslipidemia, systolic and diastolic blood pressures, Killip class, aspirin use, statin use, hsCRP, smoking, total cholesterol, triglycerides, HDL cholesterol, LDL cholesterol, serum creatinine, PAD, CVA, previous myocardial infarction, and heart failure.

SUPPLEMENTARY DATA

**Supplementary Table 4.** Clinical characteristics of the four selected groups based on admission serum glucose and HbA1c levels in AMI patients with type 2 diabetes.

| Group                    | A (n=107)<br><6.5 (48)<br>< 3.9 | B (n=856)<br><6.5 (48)<br>≥11.11 | C (n=132)<br>≥8 (64)<br><3.9 | D (n=1468)<br>≥8 (64 )<br>≥11.11 | P value |
|--------------------------|---------------------------------|----------------------------------|------------------------------|----------------------------------|---------|
| HbA1c[% (mmol/l)]        |                                 |                                  |                              |                                  |         |
| Serum glucose (mmol/l)   |                                 |                                  |                              |                                  |         |
| Age (years)              | 69.7±1.2 <sup>a</sup>           | 67.8±0.4 <sup>a,b</sup>          | 66.3±1.0 <sup>b</sup>        | 61.7±0.3 <sup>c</sup>            | <0.001  |
| Sex (female)             | 41.12%                          | 38.90%                           | 36.36%                       | 33.11%                           | 0.023   |
| BMI (kg/m <sup>2</sup> ) | 23.5±0.34                       | 23.7±0.11                        | 23.4±0.29                    | 24.0±0.08                        | 0.273   |
| sBP (mmHg)               | 130.6±2.66                      | 128.1±0.95                       | 127.6±2.47                   | 124.0±0.08                       | 0.666   |
| dBP (mmHg)               | 77.0±1.45                       | 77.9±0.55                        | 77.1±1.46                    | 78.3±0.42                        | 0.719   |
| Killip class I           | 62.61%                          | 56.21%                           | 62.48%                       | 67.28%                           | <0.001  |
| II                       | 11.21%                          | 16.77%                           | 15.75%                       | 15.40%                           |         |
| III                      | 13.08%                          | 15.75%                           | 11.17%                       | 11.49%                           |         |
| IV                       | 8.41%                           | 11.27%                           | 10.59%                       | 5.82%                            |         |
| Glucose (mmol/l)         | 3.15±0.09                       | 12.09±0.14                       | 3.23±0.09                    | 18.42±0.17                       | <0.001  |
| HbA1c (%)                | 6.34±0.09                       | 6.38±0.02                        | 9.09±0.28                    | 9.62±0.04                        | <0.001  |
| HbA1c (mmol/mol)         | 46.0±0.62                       | 46.2±0.21                        | 76.8±1.19                    | 82.0±0.42                        | <0.001  |
| TG (mmol/l)              | 1.27±0.08 <sup>a</sup>          | 1.37±0.03 <sup>a,b</sup>         | 1.27±0.08 <sup>b,c</sup>     | 1.62±0.03 <sup>c</sup>           | <0.001  |
| Creatinine (µmol/L)      | 135.44±13.91 <sup>a,b</sup>     | 146.82±78.5 <sup>b</sup>         | 147.96±16.21 <sup>b</sup>    | 108.63±2.75 <sup>a</sup>         | <0.001  |
| HDL cholesterol (mmol/l) | 1.06±0.03                       | 1.06±0.01                        | 1.09±0.03                    | 1.07±0.01                        | 0.686   |
| LDL cholesterol (mmol/l) | 2.82±0.12 <sup>a</sup>          | 2.72±0.03 <sup>a</sup>           | 2.64±0.10 <sup>a</sup>       | 3.02±0.03 <sup>b</sup>           | <0.001  |
| hsCRP (mg/L)             | 14.9±3.04                       | 12.7±1.65                        | 9.3±1.79                     | 11.3±1.08                        | 0.674   |
| Hypertension             | 92.75%                          | 95.29%                           | 96.10%                       | 89.14%                           | <0.001  |
| Diabetes treatment       | 69.81%                          | 74.25%                           | 60.94%                       | 74.35%                           | <0.001  |
| Previous MI              | 4.67%                           | 7.11%                            | 8.78%                        | 6.52%                            | 0.037   |
| Heart failure            | 6.54%                           | 3.96%                            | 3.79%                        | 2.51%                            | 0.051   |
| PAD                      | 0.03%                           | 1.63%                            | 1.52%                        | 0.54%                            | 0.038   |
| CVA                      | 12.15%                          | 9.86%                            | 9.09%                        | 6.39%                            | 0.030   |
| Smoking                  | 41.35%                          | 45.74%                           | 51.56%                       | 57.35%                           | <0.001  |
| Statin use               | 12.15%                          | 9.32%                            | 17.42%                       | 10.12%                           | 0.036   |
| Aspirin use              | 16.82%                          | 19.23%                           | 22.73%                       | 16.85%                           | 0.230   |
| Hypertension treatment   | 92.75%                          | 95.29%                           | 96.10%                       | 89.14%                           | <0.001  |
| ACE inhibitor            | 5.61%                           | 4.89%                            | 4.55%                        | 3.26%                            | 0.192   |
| ARB                      | 12.14%                          | 10.37%                           | 14.39%                       | 8.69%                            | 0.102   |

SUPPLEMENTARY DATA

|              |        |        |        |       |       |
|--------------|--------|--------|--------|-------|-------|
| CCB          | 16.82% | 13.64% | 12.12% | 9.31% | 0.003 |
| Beta blocker | 8.41%  | 9.56%  | 11.36% | 7.40% | 0.179 |
| Diuretics    | 9.35%  | 7.23%  | 9.09%  | 4.35% | 0.003 |

\*Different letters in superscript following values indicate statistical significance between groups based on Tukey's post hoc analysis. The abbreviations are the same as those used in Supplementary Table 1.

Investigators in Korea Acute Myocardial Infarction Registry (KAMIR) and Korea Working Group on Myocardial Infarction (KorMI)

Myung Ho Jeong, MD; Young Keun Ahn, MD; Sung Chull Chae, MD; Jong Hyun Kim, MD; Seung Ho Hur, MD; Yong Jo Kim, MD; In Whan Seong, MD; Dong Hoon Choi, MD; Jei Keon Chae, MD; Taek Jong Hong, MD; Jae Young Rhew, MD; Doo Il Kim, MD; In Ho Chae, MD; Jung Han Yoon, MD; Bon Kwon Koo, MD; Byung Ok Kim, MD; Myung Young Lee, MD; Kee Sik Kim, MD; Jin Youg Hwang, MD; Myeong Chan Cho, MD; Seok Kyu Oh, MD; Nae Hee Lee, MD; Kyung Tae Jeong, MD; Seung Jea Tahk, MD; Jang Ho Bae, MD; Seung Woon Rha, MD; Keum Soo Park, MD; Chong Jin Kim, MD; Kyoo Rok Ha, MD; Tae Hoon Ahn, MD; Moo Hyun Kim, MD; Ki Bae Seung, MD; Wook Sung Chung, MD; Ju Young Yang, MD; Chong Yun Rhim, MD; Hyeon Cheol Gwon, MD; Seong Wook Park, MD; Young Youp Koh, MD; Seung Jae Joo, MD; Soo Joong Kim, MD; Dong Kyu Jin, MD; Jin Man Cho, MD; Byung Ok Kim, MD; Sang-Wook Kim, MD; Jeong Kyung Kim, MD; Tae Ik Kim, MD; Dung young Nah, MD; Si Hoon Park, MD; Sang Hyun Lee, MD; Seung Uk Lee, MD; Hang-Jae Chung, MD; Jang Hyun Cho, MD; Seung Won Jin, MD; Yang Soo Jang, MD; Jeong Gwan Cho, MD and Seung Jung Park, MD.
